# Supplementary material for: Cation and ligand roles in the coordination of FeIII bisdithiolene complexes; the crystal structures of (BrBzPy)2[Fe(qdt)2]2 and [Fe(α-tpdt)2]22− salts
Source: Royal Society of Chemistry journal article supplement (doi:10.1039/b813242a), 2009-01-01
Supplement: b813242a.pdf [file b813242a.pdf]

## Supplementary material for

Cation and ligand roles in the coordination of FeIII bisdithiolene complexes; The crystal structures of BrBzPy [Fe(qdt)<sub>2</sub>] and [Fe(α-tpdt)<sub>2</sub>] salts, by Ana Isabel Soares Neves, Isabel Cordeiro Santos, Dulce Belo and Manuel Almeida.

Table S1: Short contacts and hydrogen bonds in the crystal structure of BrBzPy[Fe(qdt)<sub>2</sub>] (1)

|                            | Interactions | Symmetry Op.<br>contacting atom | d (Å) | Angle(°) |
|----------------------------|--------------|---------------------------------|-------|----------|
| Fe1···S3 <sup>1</sup>      | DD           | 2-x,-y,1-z                      | 3.824 |          |
| C11···C1 <sup>2</sup>      | DD           | 2-x,-y,1-z                      | 3.292 |          |
| C15···C3 <sup>2</sup>      | DD           | 2-x,-y,1-z                      | 3.262 |          |
| S1···C9 <sup>2</sup>       | DD           | 2-x,-y,1-z                      | 3.529 |          |
| S2···C10 <sup>1</sup>      | inD          | -x,-y,-z                        | 3.432 |          |
| Br1···C7 <sup>3</sup>      | CA           | 1+x, y,-1+z                     | 3.534 |          |
| Br1···H15-C15 <sup>4</sup> | CA           | 1-x, -y, -z                     | 3.043 | 137      |
| N1···H27-C27 <sup>5</sup>  | CA           | 2-x,1-y,1-z                     | 2.697 | 118      |
| N1···H28-C28 <sup>5</sup>  | CA           | 2-x,1-y,1-z                     | 2.503 | 128      |
| N2···H25-C25 <sup>6</sup>  | CA           | 1-x, -y, 1-z                    | 2.519 | 172      |
| N3···H24-C24 <sup>7</sup>  | CA           | x, y, z                         | 2.345 | 118      |
| S1···H21-C21 <sup>5</sup>  | CA           | 2-x,1-y,1-z                     | 2.959 | 155      |
| S2···H17-C17 <sup>5</sup>  | CA           | 2-x,1-y,1-z                     | 2.958 | 165      |
| S3···H20-C20 <sup>5</sup>  | CA           | 2-x,1-y,1-z                     | 3.373 | 150      |
| S4···H21-C21 <sup>8</sup>  | CA           | 1+x,1+y, z                      | 2.884 | 116      |
| C19-H19···C25 <sup>5</sup> | CC           | 2-x,1-y,1-z                     | 2.876 | 145      |
| C19-H19···C26 <sup>5</sup> | CC           | 2-x,1-y,1-z                     | 2.810 | 169      |
| C19-H19···C27 <sup>5</sup> | CC           | 2-x,1-y,1-z                     | 2.870 | 163      |

D= dimmer, inD=intradimmer, C=cation and A=anion

Table S2: Short contacts and hydrogen bonds in the crystal structure of BrBzPy[Fe(α-tpdt)<sub>2</sub>] (2)

|               | Interactions | Symmetry Op.<br>contacting atom | d (Å) | Angle(°) |
|---------------|--------------|---------------------------------|-------|----------|
| Br1···C16     | CC           | x, ½ -y, ½ +z                   | 3.380 |          |
| C16···H11     | CC           | 1-x, 1-y, -z                    | 2.850 |          |
| C17···H11     | CC           | 1-x, 1-y, -z                    | 2.822 |          |
| S2···C13      | CA           | 1-x, 1-y, 1-z                   | 3.473 |          |
| Br1···H8-C8   | CA           | 1-x, 1-y, z                     | 3.017 | 139°     |
| S1···H10-C10  | CA           | -x, 1-y, z                      | 2.811 | 156°     |
| S2···H12-C12  | CA           | 1-x, 1-y, 1-z                   | 2.923 | 120°     |
| S2···H13-C13  | CA           | 1-x, 1-y, 1-z                   | 2.861 | 123°     |
| S2···H14b-C14 | CA           | x, y, z                         | 2.941 | 142°     |
| S5···H13-C13  | CA           | 1-x, 1-y, 1-z                   | 2.897 | 156°     |
| S6···H16-C16  | CA           | -x, 1,y, -z                     | 2.982 | 136°     |

C=cation and A=anion
